# Supplementary material for: A rapid, green and versatile route to synthesize metal carbonate superstructures via the combination of regenerated silk fibroin and compressed CO2
Source: Royal Society of Chemistry journal article supplement (doi:10.1039/c3ce41888j), 2013-10-31
Supplement: c3ce41888j.pdf [file c3ce41888j.pdf]

## Supporting Information

# A rapid, green and versatile route to synthesize metal carbonate superstructures *via* the combination of regenerated silk fibroin and compressed CO<sub>2</sub>

Shengjie Xu, Peiyi Wu\*

*Laboratory of Advanced Materials, State Key Laboratory of Molecular Engineering of Polymers, Department of*

*Macromolecular Science, Fudan University, Shanghai, 200433, P. R. China.*

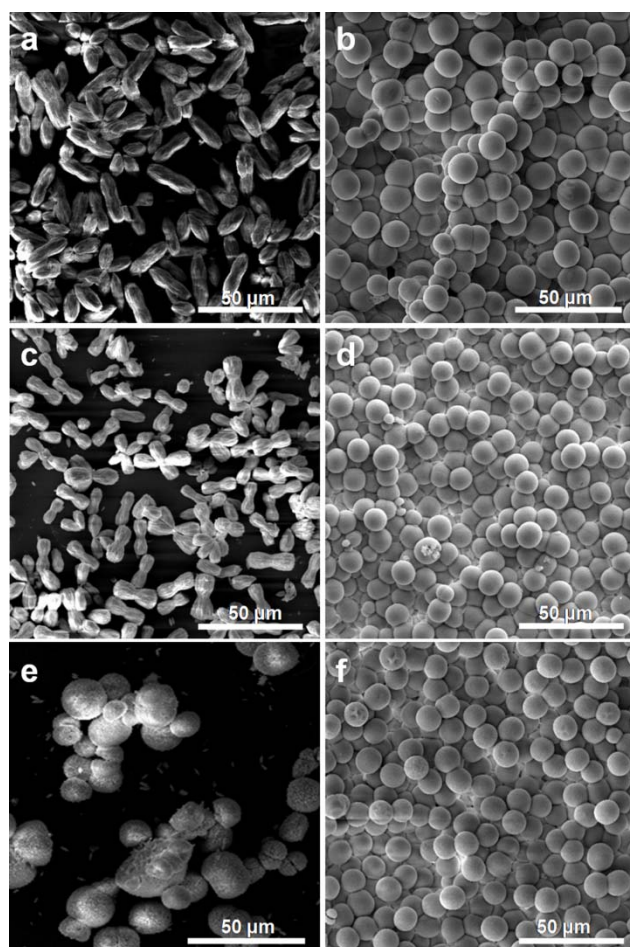

**Fig. S1** SEM images of BaCO<sub>3</sub> particles prepared in different concentration RSF solution with 5.0 MPa compressed CO<sub>2</sub> at 60 °C after 60 min mineralization: (a) 0.01 wt %; (b) 0.1 wt %; (c) 0.5 wt %; (d) 1 wt %; (e) 1.5 wt % and (f) 3 wt %.

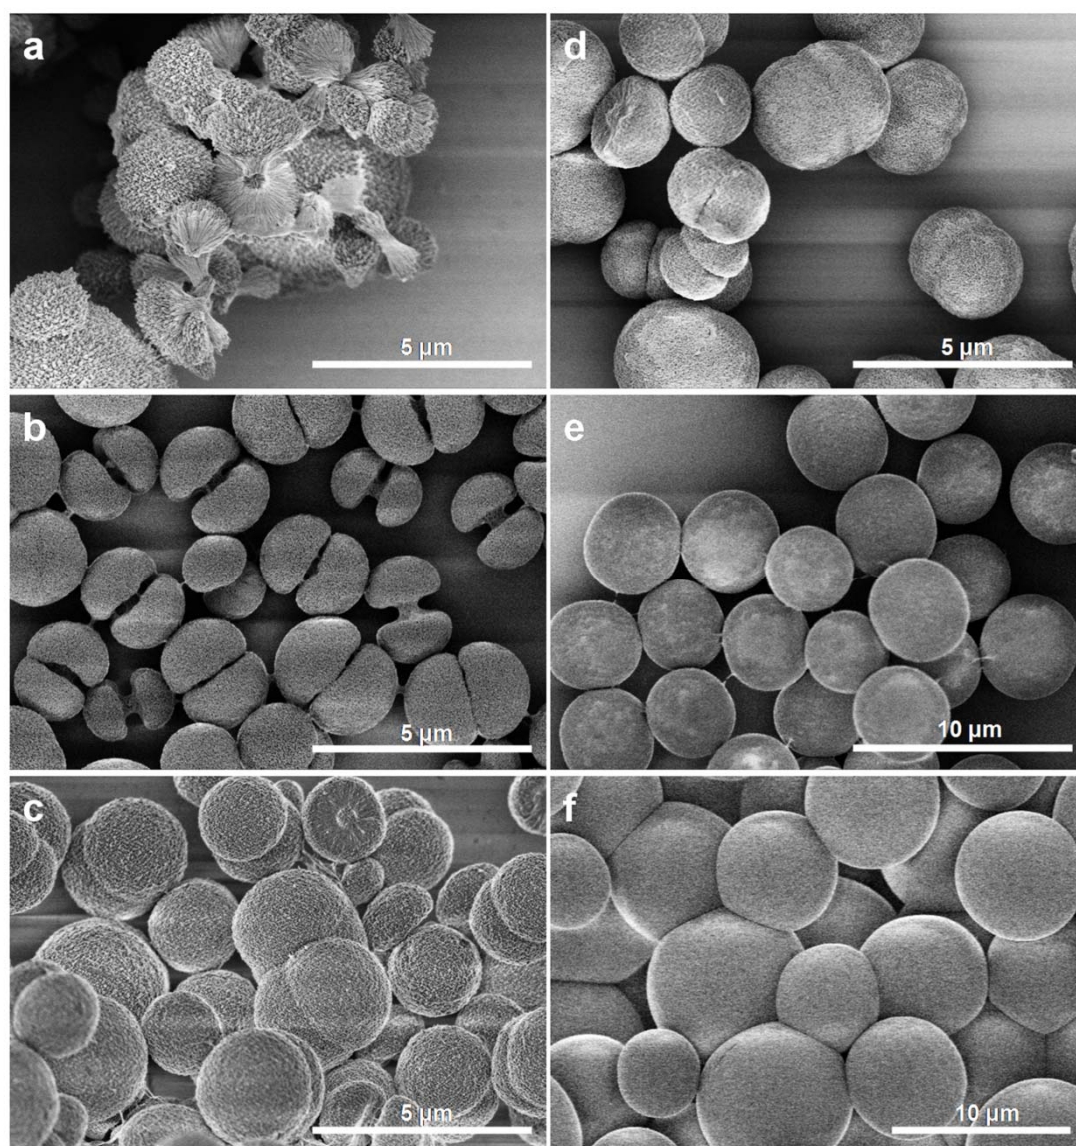

**Fig. S2** FESEM images of SrCO<sub>3</sub> generated in different concentration RSF solution with 5.0 MPa compressed CO<sub>2</sub> at 60 °C after 60 min mineralization: (a) 0.01 wt %; (b) 0.1 wt %; (c) 0.5 wt %; (d) 1 wt %; (e) 1.5 wt % and (f) 3 wt %.

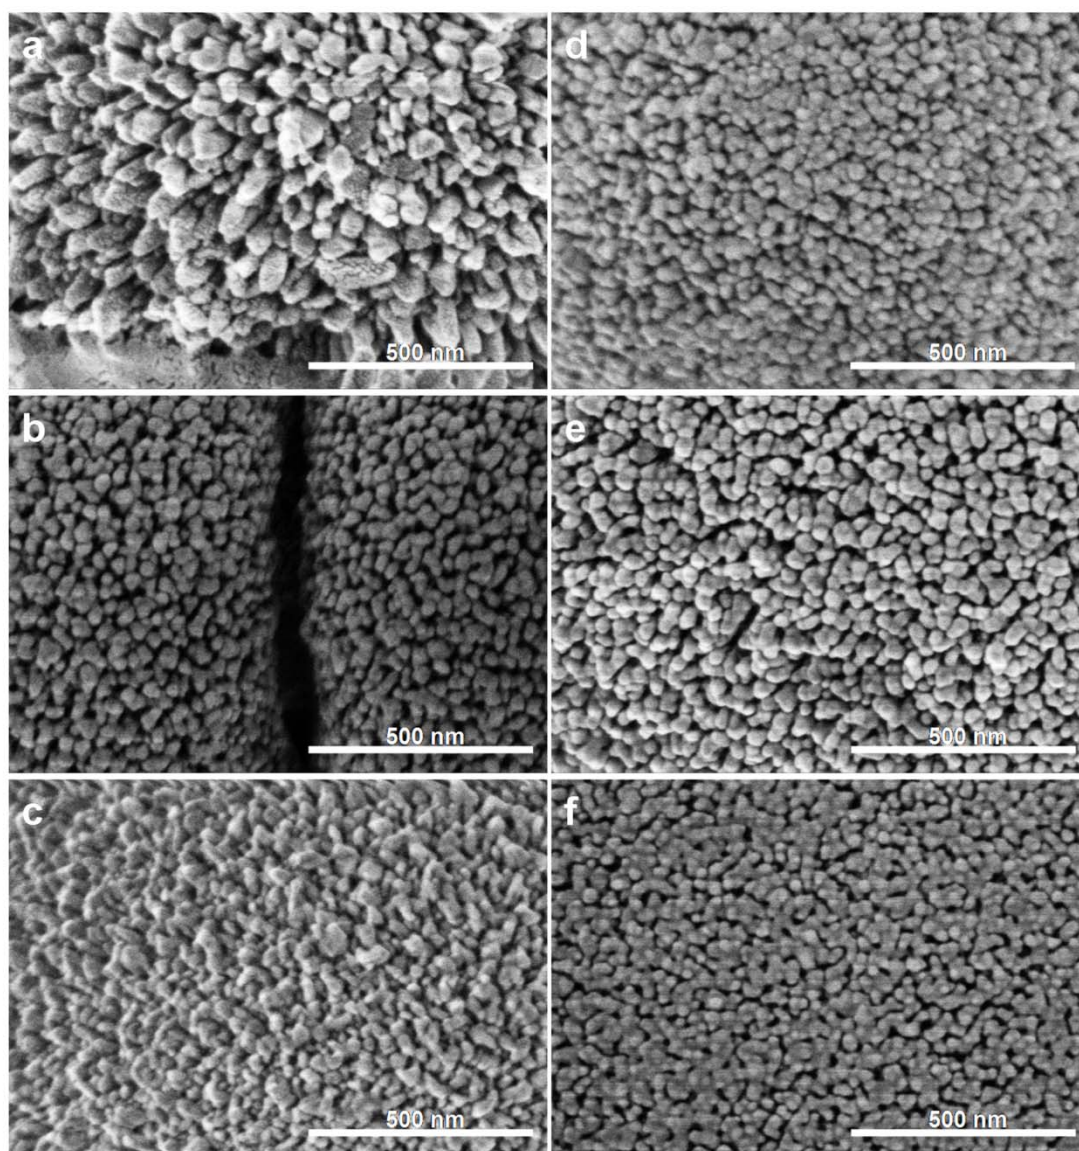

**Fig. S3** FESEM images of  $\text{SrCO}_3$  generated in different concentration RSF solution with 5.0 MPa compressed  $\text{CO}_2$  at 60 °C after 60 min mineralization: (a) 0.01 wt %; (b) 0.1 wt %; (c) 0.5 wt %; (d) 1 wt %; (e) 1.5 wt % and (f) 3 wt %.

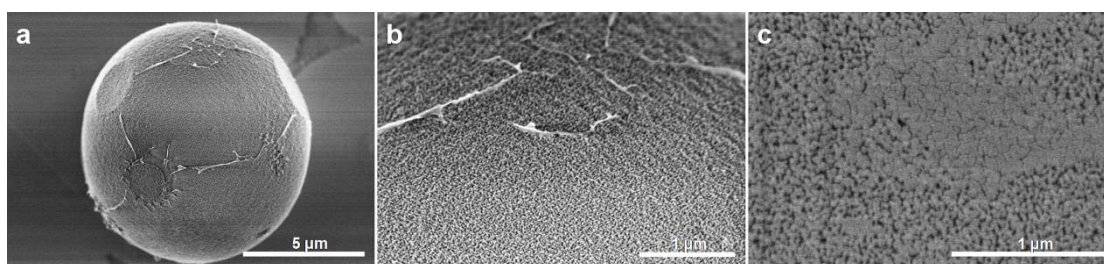

**Fig. S4** FESEM images of  $\text{SrCO}_3$  obtained in 3 wt% concentration RSF solution with 5.0 MPa compressed  $\text{CO}_2$  at 60

$^{\circ}\text{C}$ : (a) panoramic image of  $\text{SrCO}_3$ ; (b) and (c) enlarged image of (a). The fuzzy area in Fig. S4c are flexible RSF chains.

In Fig. S4a and b, the filiform on crystal surface is the bigger RSF which is well-assembled by many single RSF chains. It shows that most of these RSF chains are almost completely released from crystals. However, Fig. S4c shows many RSF chains which maintain flexible chain are still adsorb on crystal surface, it is not easy to remove them due to part of these chains are still intercalated into crystal.

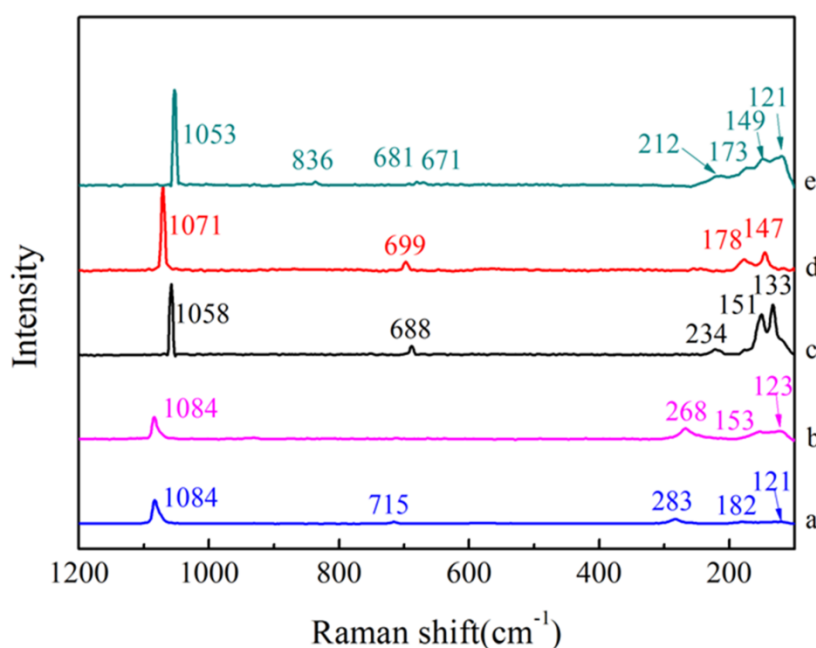

**Fig. S5** Raman spectra of different metal carbonates crystallized in 1.5 wt% RSF solution at 60  $^{\circ}\text{C}$  with 5.0 MPa compressed  $\text{CO}_2$  after 60 min mineralization: (a)  $\text{MnCO}_3$ ; (b)  $\text{CdCO}_3$ ; (c)  $\text{BaCO}_3$ ; (d)  $\text{SrCO}_3$  and (e)  $\text{PbCO}_3$ .

In Raman spectra of metal carbonates, the peaks range from 1000 to 1100  $\text{cm}^{-1}$  are assigned to symmetric C-O stretching ( $\nu_1$ ) of  $\text{CO}_3^{2-}$  groups, while the peaks locate between 650 and 720  $\text{cm}^{-1}$  are referred to in-plane bending ( $\nu_4$ ) of  $\text{CO}_3^{2-}$  groups, and the peaks seat between 800 and 850  $\text{cm}^{-1}$  are attributed to out-plane bending ( $\nu_2$ ) of  $\text{CO}_3^{2-}$  groups, all of above peaks are assigned to internal mode of  $\text{CO}_3^{2-}$  groups, suggesting that the peaks are not significantly affected by different metal ions. As shown in Fig. S5, the metal ions only make peak position shift in these sections. Moreover, the peaks locate at 100 and 290  $\text{cm}^{-1}$  are assigned to lattice vibration (external mode) of  $\text{CO}_3^{2-}$  groups.<sup>1,2</sup> In the section, the peaks are associated with the metal ions and  $\text{CO}_3^{2-}$  groups along different axis and with rotation of  $\text{CO}_3^{2-}$  groups, so the peaks are evidently impacted with changing the metal ions. The Raman spectra of these metal carbonates are identified from other references,<sup>3-5</sup> as shown in Fig. S5.

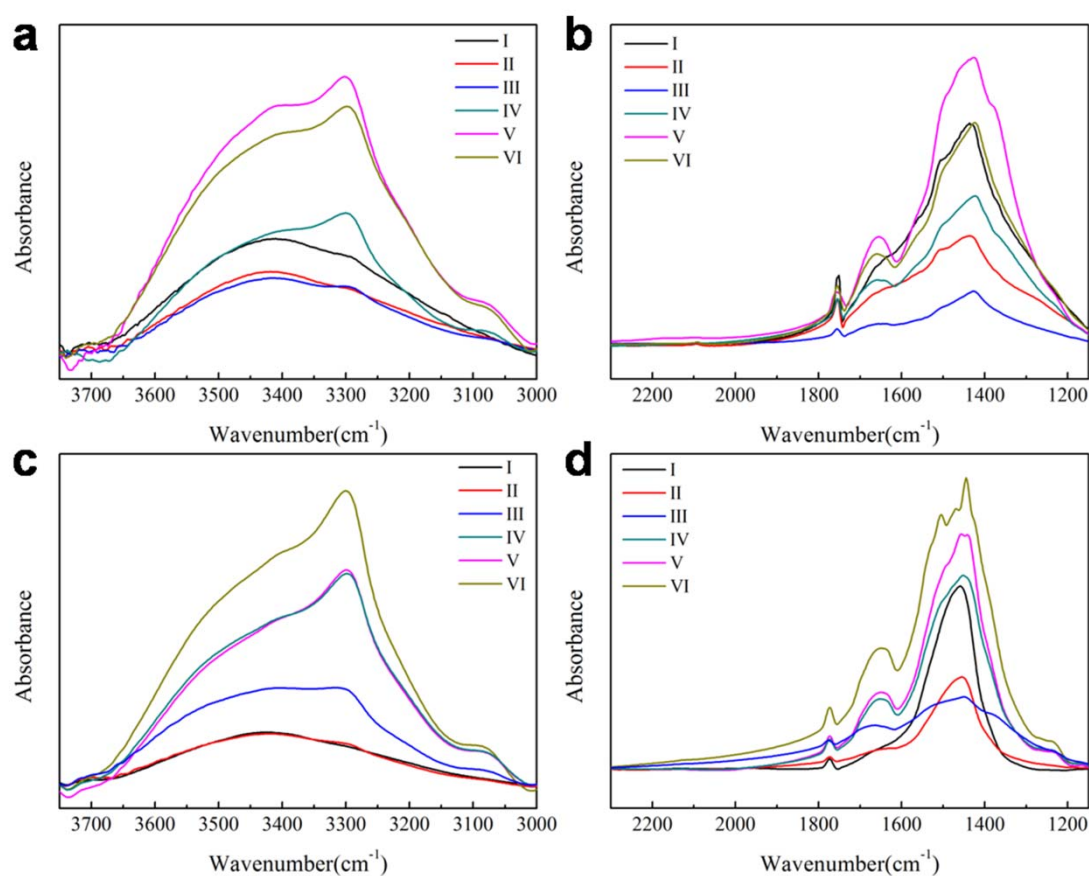

**Fig. S6** FTIR spectra of  $\text{BaCO}_3$  (a, b) and  $\text{SrCO}_3$  (c, d) prepared with different RSF concentration: (I) 0.01 wt %; (II)

0.1 wt %; (III) 0.5 wt %; (III) 1 wt %; (IV) 1.5 wt % and (V) 3 wt %.

In FTIR spectra, the band at  $1650\text{ cm}^{-1}$  and  $3280\text{ cm}^{-1}$  are assigned to the amide I and the N-H stretching of RSF chains. When additive RSF is fewer than 0.1 wt % intensity of RSF feature peak is very weak, with the increase of RSF concentration, the peak intensity is obviously improved, suggesting some RSF are residual in crystals during the crystallization.

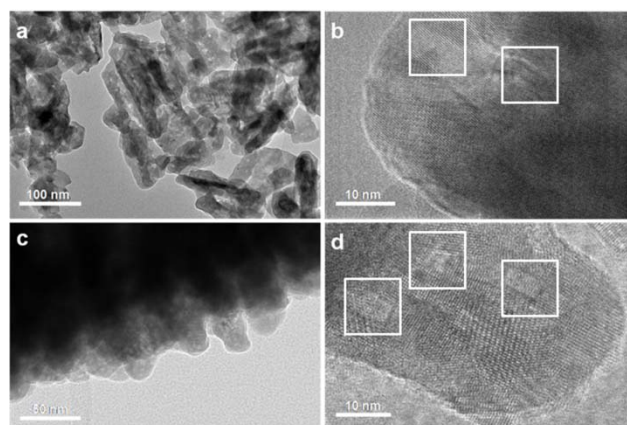

**Fig. S7** TEM and HRTEM images of  $\text{BaCO}_3$  (a, b) and  $\text{SrCO}_3$  (c, d) obtained in different concentration RSF solution with 5.0 MPa compressed  $\text{CO}_2$  at  $60^\circ\text{C}$ . The marked areas with square shape are the mesopores and defects.

Fig. S7a and c shows the subunits of  $\text{BaCO}_3$  and  $\text{SrCO}_3$  are needle-like. The HRTEM images indicate the both crystals have well-crystallized structure (Fig. S7b and d); however, many defects can be seen in these TEM images. These defects probably result from the intercalation of RSF chains into crystals to destroy the orderly crystallization process of crystals.

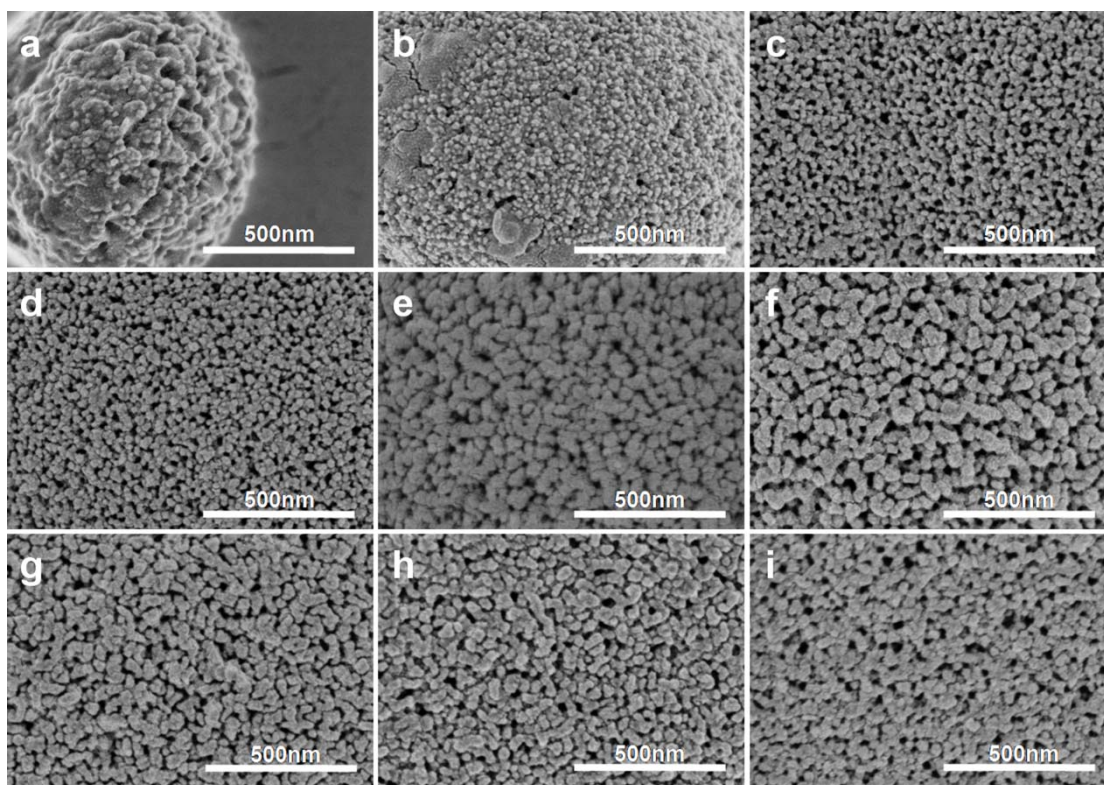

**Fig. S8** Enlarged FE-SEM images of  $\text{BaCO}_3$  crystal prepared after different mineralization time in 1.5 wt % RSF solution at 60 °C with 5.0 MPa compressed  $\text{CO}_2$  at 60 °C: (a) 5 min; (b) 8 min; (c) 10 min; (d) 13 min; (e) 15 min; (f) 20 min; (g) 25 min; (h) 45 min and (i) 60 min.

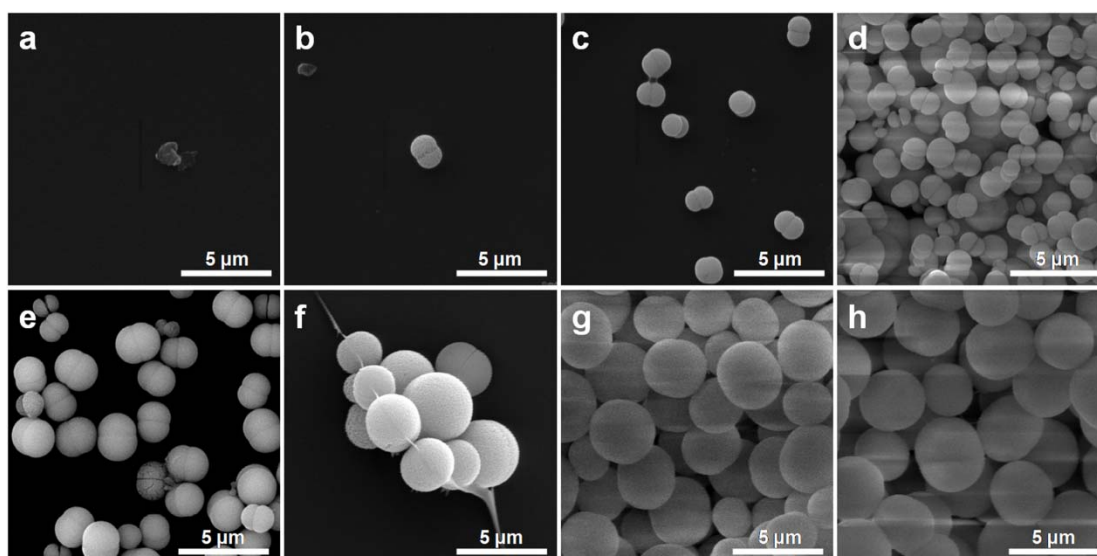

**Fig. S9** SEM images of  $\text{SrCO}_3$  crystal prepared after different mineralization time in 1.5 wt % RSF solution at 60 °C with 5.0 MPa compressed  $\text{CO}_2$  at 60 °C: (a) 10 min; (b) 15 min; (c) 18 min; (d) 20 min; (e) 30 min; (f) 45 min; (g) 60 min and (h) 90 min.

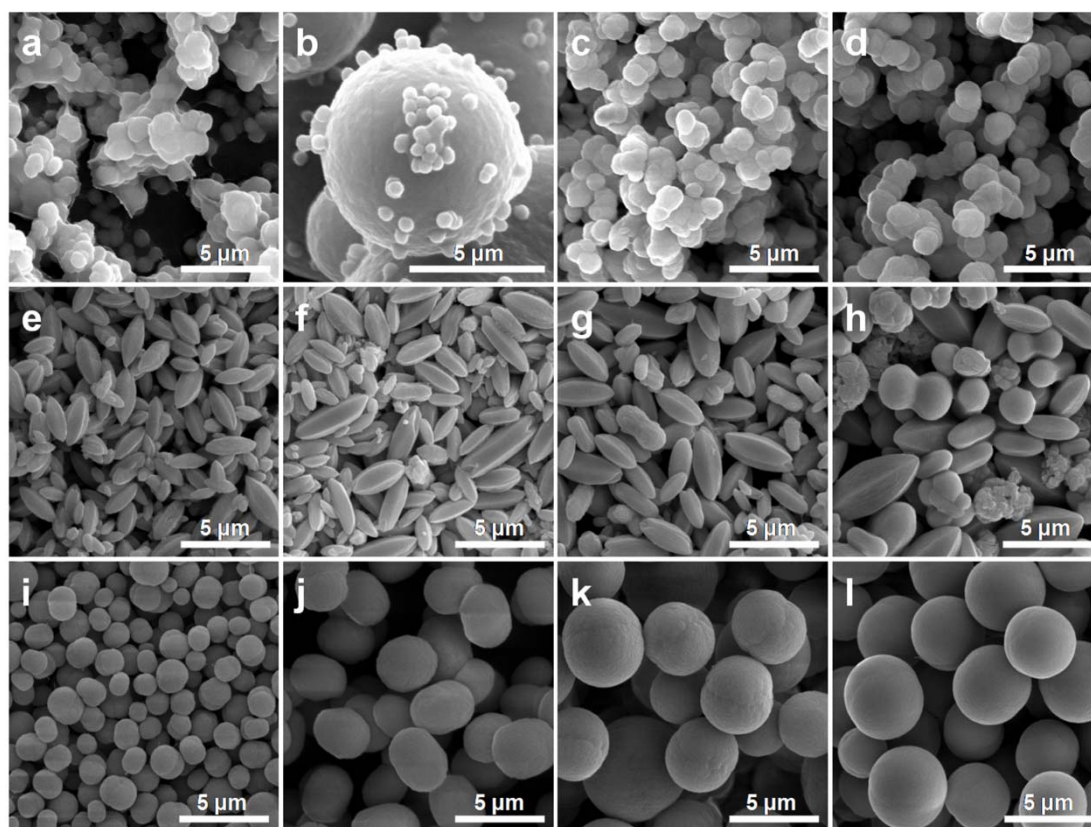

**Fig. S10** SEM images of  $\text{MnCO}_3$  (top),  $\text{PbCO}_3$  (middle) and  $\text{CdCO}_3$  (bottom) obtained in different RSF solution at 60 °C for 60 min with 5.0 MPa compressed  $\text{CO}_2$ : (a, e, i) 0.1 wt%; (b, f, j) 0.5 wt%; (c, g, k) 1 wt% and (d, h, l) 1.5 wt %.

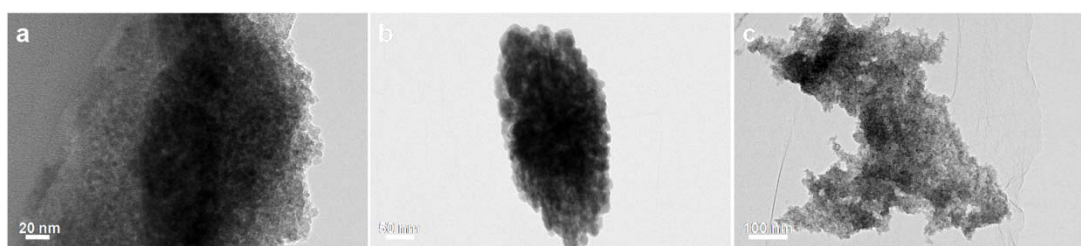

**Fig. S11** TEM images of cross section of metal carbonates prepared in 1.5 wt % RSF solution at 60 °C for 60 min with 5.0 MPa compressed  $\text{CO}_2$ : (a)  $\text{MnCO}_3$ ; (b)  $\text{PbCO}_3$  and (c)  $\text{CdCO}_3$ .

TEM images show the  $\text{MnCO}_3$  and  $\text{CdCO}_3$  particles are formed by the random aggregation of spherical nanoparticles (Fig. S11a and c); however, the  $\text{PbCO}_3$  particles are formed by the orderly

assemble of needle-like subunits which is similar to  $\text{BaCO}_3$  and  $\text{SrCO}_3$  crystals (Fig. S11b).

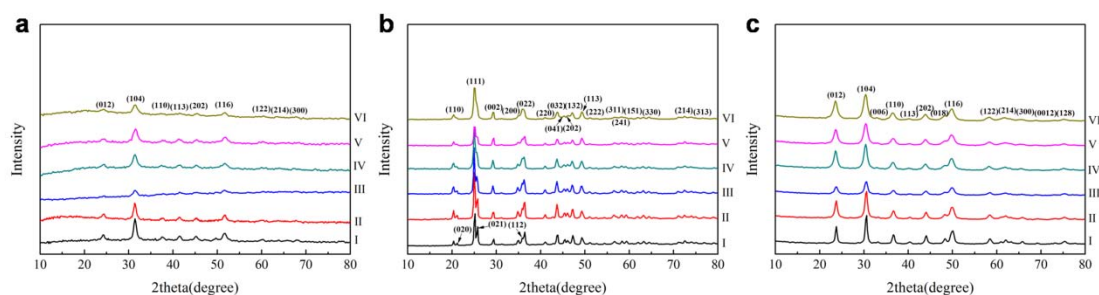

**Fig. S12** XRD patterns of  $\text{MnCO}_3$  (a),  $\text{PbCO}_3$  (b) and  $\text{CdCO}_3$  (c) prepared in different RSF solution at 60 °C for 60 min with 5.0 MPa compressed  $\text{CO}_2$ : (I) 0 wt%; (II) 0.1 wt%; (III) 0.5 wt%; (IV) 1 wt%; (V) 1.5 wt% and (VI) 3 wt%. The parameters of crystal are referenced to JCPDF (86-0173), (76-2056) and (42-1342).

Fig. S12a and c show the independence of polymorph of  $\text{MnCO}_3$  and  $\text{PbCO}_3$  particles on RSF concentration; however, the peaks on XRD patterns of  $\text{PbCO}_3$  crystals are evidently influenced by changing the RSF concentration (Fig. S12b). Three peaks which are assigned to (020), (021) and (112) faces of cerussite gradually disappear with the increase of RSF concentration, indicating that RSF chains can impact or regulate the polymorph of  $\text{PbCO}_3$  crystals.

## References

1. R. Minch, L. Dubrovinsky, A. Kurnosov, L. Ehm, K. Knorr and W. Depmeier, *Phys. Chem. Miner.*, 2010, **37**, 45-56.
2. U. Wehrmeister, A. L. Soldati, D. E. Jacob, T. Hager and W. Hofmeister, *J. Raman Spectrosc.*, 2010, **41**, 193-201.
3. S. Ni, X. Yang and T. Li, *Mater. Lett.*, 2011, **65**, 766-768.
4. Y.-F. Zhang, J. Liu, Z.-X. Qin, C.-L. Lin, L. Xiong, R. Li and L.-G. Bai, *Chinese Phys. C*, 2013, **37**.
5. D. Shen, W. Li, S. Xu and P. Wu, *J. Cryst. Growth*, 2012, **353**, 101-107.
